# Supplementary material
Source: PubMed Central journal article supplement (PMC2989895)
Supplement: supp_ddq423_ddq423supp.pdf [file supp_ddq423_ddq423supp.pdf]

## Supplementary Material

### **Genome-wide association study for adiponectin levels in Filipino women identifies *CDH13* and a novel uncommon haplotype at *KNG1-ADIPOQ***

Ying Wu<sup>1</sup>, Yun Li<sup>1,2</sup>, Ethan M. Lange<sup>1,2</sup>, Damien C. Croteau-Chonka<sup>1</sup>, Christopher W. Kuzawa<sup>4,5</sup>, Thomas W. McDade<sup>4,5</sup>, Li Qin<sup>1</sup>, Ghenadie Curocichin<sup>1,6</sup>, Judith B. Borja<sup>7</sup>, Leslie A. Lange<sup>1</sup>, Linda S. Adair<sup>3</sup>, Karen L. Mohlke<sup>1</sup>

<sup>1</sup> Department of Genetics, <sup>2</sup> Department of Biostatistics and <sup>3</sup> Department of Nutrition, University of North Carolina, Chapel Hill, NC 27599, USA, <sup>4</sup> Department of Anthropology, Northwestern University, Evanston, IL 60208, USA, <sup>5</sup>Cells 2 Society: The Center for Social Disparities and Health at the Institute for Policy Research, Northwestern University, Evanston, IL 60208, USA, <sup>6</sup> Department of Family Medicine, State Medical and Pharmaceutical University, Chisinau, Moldova and <sup>7</sup>Office of Population Studies Foundation, University of San Carlos, Cebu City 6000, Philippines

**Supplementary Table 1.** Correlation between log adiponectin and other metabolic-related traits

|                     | Mothers samples         |          | Offspring samples       |          |
|---------------------|-------------------------|----------|-------------------------|----------|
|                     | Correlation coefficient | <i>P</i> | Correlation coefficient | <i>P</i> |
| Log_BMI             | -0.32                   | < 0.0001 | -0.28                   | < 0.0001 |
| Waist circumference | -0.33                   | < 0.0001 | -0.28                   | < 0.0001 |
| Log_triglyceride    | -0.34                   | < 0.0001 | -0.24                   | < 0.0001 |
| Log_HDL-C           | 0.17                    | < 0.0001 | 0.18                    | < 0.0001 |
| Log_LDL-C           | -0.03                   | 0.20     | -0.05                   | 0.032    |
| Log_glucose         | -0.25                   | < 0.0001 | -0.03                   | 0.21     |
| Log_insulin         | -0.37                   | < 0.0001 | -0.18                   | < 0.0001 |
| Log_HOMA-IR         | -0.40                   | < 0.0001 | -0.17                   | < 0.0001 |
| Log_HOMA- $\beta$   | -0.19                   | < 0.0001 | -0.16                   | < 0.0001 |

Analysis of CLHNS mothers was adjusted for age, age<sup>2</sup>, household assets, log-transformed household income and menopausal status; Analysis of CLHNS offspring was adjusted for sex, household assets and log-transformed household income.

**Supplementary Table 2.** Association of plasma adiponectin level with covariates, including 10 principal components of population structure in CLHNS mothers ( $n = 1,776$ )

| Covariate                            | Adjusted for | $\beta$ (SE)   | $P$      |
|--------------------------------------|--------------|----------------|----------|
| Age*                                 | 1            | 0.015 (0.002)  | 1.02E-19 |
| Age <sup>2</sup> *                   | 2            | 0.000 (0.000)  | 0.038    |
| Household assets*                    | 3            | -0.289 (0.005) | 9.36E-09 |
| Log-transformed household income*    | 3            | -0.049 (0.012) | 2.86E-05 |
| Number of Pregnancies (3 categories) | 3            | ----           | 0.61     |
| Menopausal status*                   | 3            | 0.070 (0.028)  | 0.012    |
| PC1                                  | 4            | 0.365 (0.405)  | 0.37     |
| PC2                                  | 4            | 0.272 (0.397)  | 0.49     |
| PC3                                  | 4            | 0.629 (0.401)  | 0.12     |
| PC4                                  | 4            | -0.333 (0.410) | 0.42     |
| PC5                                  | 4            | -0.305 (0.408) | 0.46     |
| PC6                                  | 4            | 0.752 (0.408)  | 0.066    |
| PC7                                  | 4            | -0.338 (0.412) | 0.41     |
| PC8                                  | 4            | 0.529 (0.412)  | 0.20     |
| PC9                                  | 4            | 0.128 (0.412)  | 0.76     |
| PC10                                 | 4            | -0.094 (0.415) | 0.82     |

Covariate tests adjusted for:

1: Nothing

2: Age

3: Age, age<sup>2</sup>

4: Age, age<sup>2</sup>, all other PCs

PC1-10 are the EIGENSTRAT principal components

\* Covariates used in analysis for plasma adiponectin

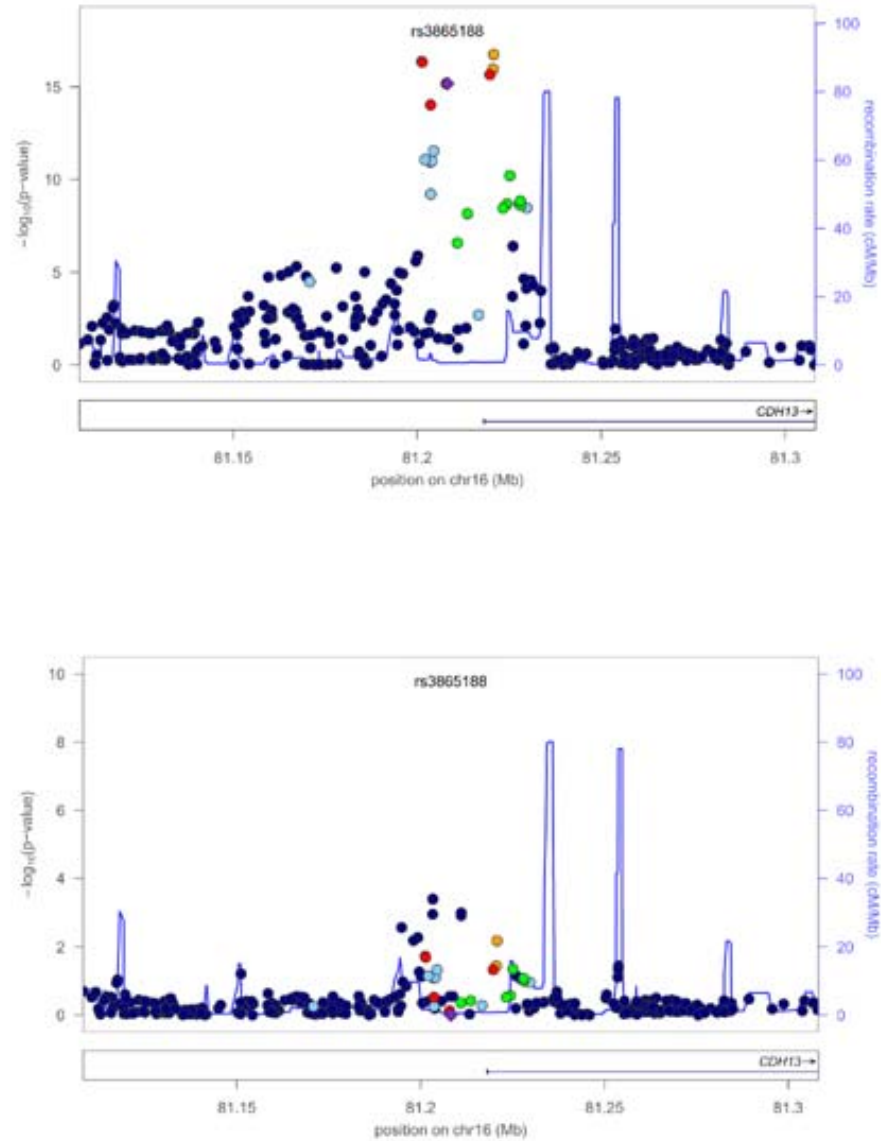

**Supplementary Figure 1.** Evidence of association between adiponectin and SNPs within the *CDH13* (chromosome 16: 81,107 kb - 81,309 kb) with and without conditional analysis. SNPs are colored based on HapMap CHB+JPT linkage disequilibrium with the index SNP in each plot. Upper panel, initial evidence of association; lower panel, evidence of association conditioning on SNP rs3865188.

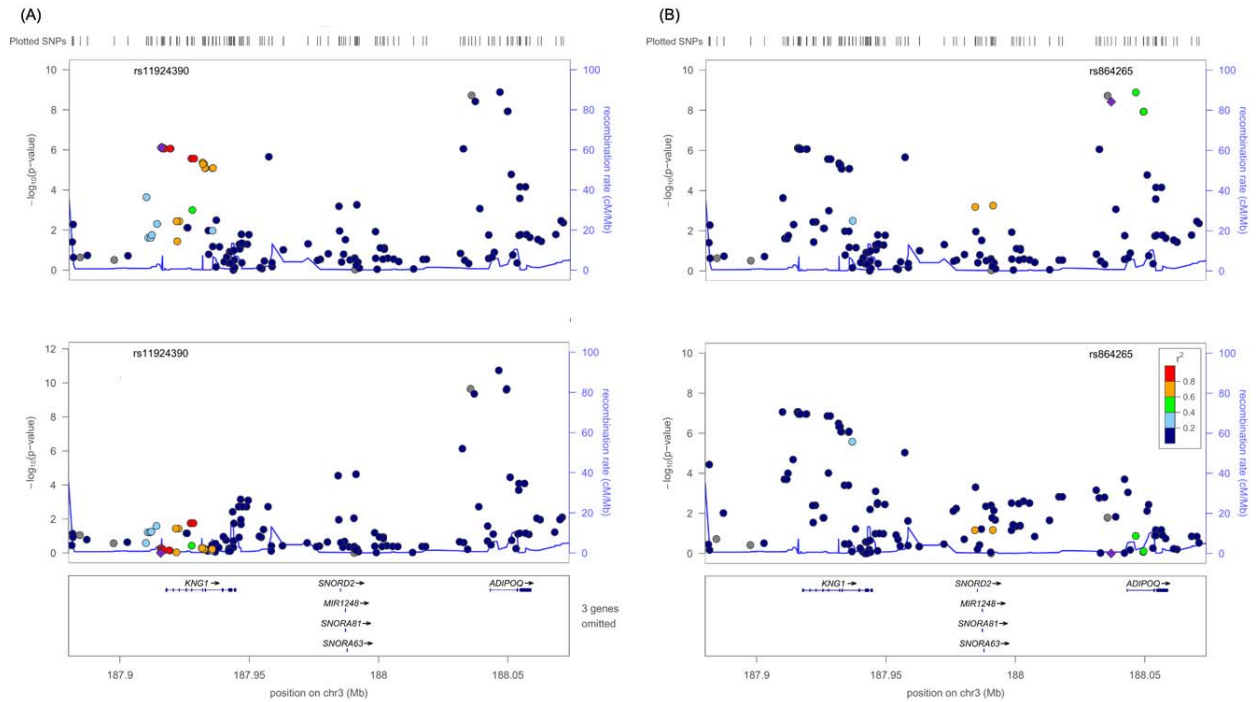

**Supplementary Figure 2.** Evidence of association between adiponectin and SNPs within the *KNG1-ADIPOQ* gene locus (chromosome 3: position 187,880 kb-188,080 kb) with and without conditional analysis. SNPs are colored based on HapMap CHB+JPT linkage disequilibrium with the index SNP in each plot. (A) index SNP rs11924390; upper panel, initial evidence of association; lower panel, evidence of association conditioning on SNP rs11924390. (B) index SNP rs864265; upper panel, initial evidence of association; lower panel, evidence of association conditioning on SNP rs864265.

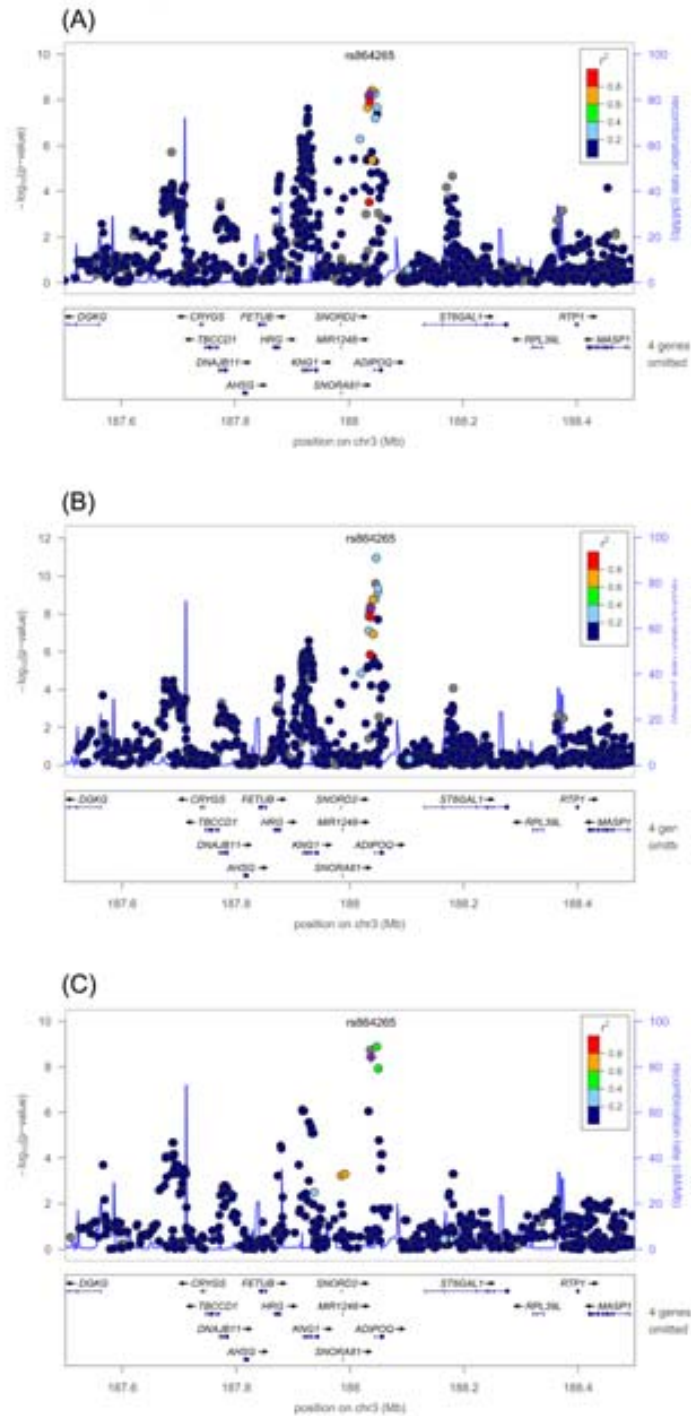

**Supplementary Figure 3.** Association with adiponectin for SNPs imputed based on HapMap or 1000 Genomes Project pilot data (August 2009 Release). (A) 1000 Genomes Project CHB+JPT combined samples; (B) 1000 Genomes Project CEU+CHB+JPT combined samples; (C) HapMap CEU+CHB+JPT combined samples. The purple diamond represents the index SNP rs864265. SNPs showing stronger association with adiponectin are either in high linkage disequilibrium with rs864265 ( $r^2 > 0.8$ ) or poorly imputed (MACH quality  $r^2 < 0.6$ ), and thus unlikely to represent a novel signal or potential functional variant.
